# Supplementary material
Source: PubMed Central journal article supplement (PMC10696927)
Supplement: NIHMS1945433-supplement-1.pdf [file NIHMS1945433-supplement-1.pdf]

1  
2  
3  
4  
5  
6  
7  
8  
9  
10  
11  
12  
13  
14  
15  
16  
17  
18  
19  
20  
21  
22  
23  
24  
25  
26  
27  
28  
29  
30  
31  
32  
33  
34  
35  
36  
37  
38  
39  
40  
41  
42  
43  
44  
45  
46  
47  
48  
49  
50  
51  
52  
53  
54  
55  
56  
57  
58  
59  
60

E-reference 1:      Distribution of baseline rectal swab and first-void urine *Chlamydia trachomatis* transcription-mediated amplification results, with stratification by six- and twelve-month follow-up encounter testing results, within the RADAR longitudinal cohort investigation.

|                                    | <b>Frequency of <i>C. trachomatis</i> Screening Result</b> |          |       |                                             |          |       |
|------------------------------------|------------------------------------------------------------|----------|-------|---------------------------------------------|----------|-------|
| <b>Baseline Rectal Swab Screen</b> | <i>Six-month Follow-up (rectal swab)</i>                   |          |       | <i>Twelve-month Follow-up (rectal swab)</i> |          |       |
|                                    | Non-reactive                                               | Reactive | Total | Non-reactive                                | Reactive | Total |
| Non-reactive                       | 652                                                        | 46       | 698   | 572                                         | 43       | 615   |
| Reactive                           | 53                                                         | 13       | 66    | 45                                          | 7        | 52    |
| Total                              | 705                                                        | 59       | 764   | 617                                         | 50       | 667   |
| <b>Baseline Urine Screen</b>       | <i>Six-month Follow-up (urine)</i>                         |          |       | <i>Twelve-month Follow-up (urine)</i>       |          |       |
|                                    | Non-reactive                                               | Reactive | Total | Non-reactive                                | Reactive | Total |
| Non-reactive                       | 755                                                        | 6        | 761   | 655                                         | 9        | 664   |
| Reactive                           | 8                                                          | 2        | 10    | 9                                           | 0        | 9     |
| Total                              | 763                                                        | 8        | 771   | 664                                         | 9        | 673   |

1  
2  
3  
4  
5  
6  
7  
8  
9  
10  
11  
12  
13  
14  
15  
16  
17  
18  
19  
20  
21  
22  
23  
24  
25  
26  
27  
28  
29  
30  
31  
32  
33  
34  
35  
36  
37  
38  
39  
40  
41  
42  
43  
44  
45  
46  
47  
48  
49  
50  
51  
52  
53  
54  
55  
56  
57  
58  
59  
60

E-reference 2:      Distribution of baseline rectal swab and first-void urine *Neisseria gonorrhoeae*  
transcription-mediated amplification results, with stratification by six- and  
twelve-month follow-up encounter testing results, within the RADAR  
longitudinal cohort investigation.

|                                    | <b>Frequency of <i>N. gonorrhoeae</i> Screening Result</b> |          |       |                                             |          |       |
|------------------------------------|------------------------------------------------------------|----------|-------|---------------------------------------------|----------|-------|
| <b>Baseline Rectal Swab Screen</b> | <i>Six-month Follow-up (rectal swab)</i>                   |          |       | <i>Twelve-month Follow-up (rectal swab)</i> |          |       |
|                                    | Non-reactive                                               | Reactive | Total | Non-reactive                                | Reactive | Total |
| Non-reactive                       | 674                                                        | 35       | 709   | 593                                         | 22       | 615   |
| Reactive                           | 44                                                         | 11       | 55    | 43                                          | 11       | 54    |
| Total                              | 718                                                        | 46       | 764   | 636                                         | 33       | 669   |
| <b>Baseline Urine Screen</b>       | <i>Six-month Follow-up (urine)</i>                         |          |       | <i>Twelve-month Follow-up (urine)</i>       |          |       |
|                                    | Non-reactive                                               | Reactive | Total | Non-reactive                                | Reactive | Total |
| Non-reactive                       | 761                                                        | 3        | 764   | 664                                         | 4        | 668   |
| Reactive                           | 6                                                          | 1        | 7     | 5                                           | 0        | 5     |
| Total                              | 767                                                        | 4        | 771   | 669                                         | 4        | 673   |

1  
2  
3  
4  
5  
6  
7  
8  
9  
10  
11  
12  
13  
14  
15  
16  
17  
18  
19  
20  
21  
22  
23  
24  
25  
26  
27  
28  
29  
30  
31  
32  
33  
34  
35  
36  
37  
38  
39  
40  
41  
42  
43  
44  
45  
46  
47  
48  
49  
50  
51  
52  
53  
54  
55  
56  
57  
58  
59  
60

E-reference 3:      Distribution of baseline rectal swab and first-void urine *Trichomonas vaginalis*  
transcription-mediated amplification results, with stratification by six- and  
twelve-month follow-up encounter testing results, within the RADAR  
longitudinal cohort investigation.

|                                    | <b>Frequency of <i>T. vaginalis</i> Screening Result</b> |          |       |                                             |          |       |
|------------------------------------|----------------------------------------------------------|----------|-------|---------------------------------------------|----------|-------|
| <b>Baseline Rectal Swab Screen</b> | <i>Six-month Follow-up (rectal swab)</i>                 |          |       | <i>Twelve-month Follow-up (rectal swab)</i> |          |       |
|                                    | Non-reactive                                             | Reactive | Total | Non-reactive                                | Reactive | Total |
| Non-reactive                       | 754                                                      | 8        | 762   | 659                                         | 9        | 668   |
| Reactive                           | 5                                                        | 1        | 6     | 2                                           | 2        | 4     |
| Total                              | 759                                                      | 9        | 768   | 661                                         | 11       | 672   |
| <b>Baseline Urine Screen</b>       | <i>Six-month Follow-up (urine)</i>                       |          |       | <i>Twelve-month Follow-up (urine)</i>       |          |       |
|                                    | Non-reactive                                             | Reactive | Total | Non-reactive                                | Reactive | Total |
| Non-reactive                       | 769                                                      | 1        | 770   | 672                                         | 0        | 672   |
| Reactive                           | 0                                                        | 1        | 1     | 0                                           | 1        | 1     |
| Total                              | 769                                                      | 2        | 771   | 672                                         | 1        | 673   |

1  
2  
3  
4  
5  
6  
7  
8  
9  
10  
11  
12  
13  
14  
15  
16  
17  
18  
19  
20  
21  
22  
23  
24  
25  
26  
27  
28  
29  
30  
31  
32  
33  
34  
35  
36  
37  
38  
39  
40  
41  
42  
43  
44  
45  
46  
47  
48  
49  
50  
51  
52  
53  
54  
55  
56  
57  
58  
59  
60

E-reference 4: Distribution of baseline rectal swab and first-void urine *Mycoplasma genitalium* transcription-mediated amplification results, with stratification by six- and twelve-month follow-up encounter testing results, within the RADAR longitudinal cohort investigation.

|                                    | <b>Frequency of <i>M. genitalium</i> Screening Result</b> |          |       |                                             |          |       |
|------------------------------------|-----------------------------------------------------------|----------|-------|---------------------------------------------|----------|-------|
| <b>Baseline Rectal Swab Screen</b> | <i>Six-month Follow-up (rectal swab)</i>                  |          |       | <i>Twelve-month Follow-up (rectal swab)</i> |          |       |
|                                    | Non-reactive                                              | Reactive | Total | Non-reactive                                | Reactive | Total |
| Non-reactive                       | 535                                                       | 66       | 601   | 463                                         | 69       | 532   |
| Reactive                           | 64                                                        | 103      | 167   | 78                                          | 62       | 140   |
| Total                              | 599                                                       | 169      | 768   | 541                                         | 131      | 672   |
| <b>Baseline Urine Screen</b>       | <i>Six-month Follow-up (urine)</i>                        |          |       | <i>Twelve-month Follow-up (urine)</i>       |          |       |
|                                    | Non-reactive                                              | Reactive | Total | Non-reactive                                | Reactive | Total |
| Non-reactive                       | 683                                                       | 19       | 702   | 594                                         | 20       | 614   |
| Reactive                           | 15                                                        | 54       | 69    | 17                                          | 40       | 57    |
| Total                              | 698                                                       | 73       | 771   | 611                                         | 60       | 671   |
